# Supplementary material for: Reactions of osmapyridinium with terminal alkynes
Source: Royal Society of Chemistry journal article supplement (doi:10.1039/c5qo00052a), 2015-01-01
Supplement: c5qo00052a1.pdf [file c5qo00052a1.pdf]

## Supporting Information

### Reactions of osmapyridinium with terminal alkynes

Yuanqing Wei, Xiaoxi Zhou, Guangning Hong, Zhixin Chen, Hong Zhang\* and Haiping Xia\*

State Key Laboratory for Physical Chemistry of Solid Surfaces, Department of Chemistry, College of Chemistry and Chemical Engineering, Xiamen University, Xiamen, 361005, China.

E-mail: zh@xmu.edu.cn; hpxia@xmu.edu.cn

#### NMR spectra

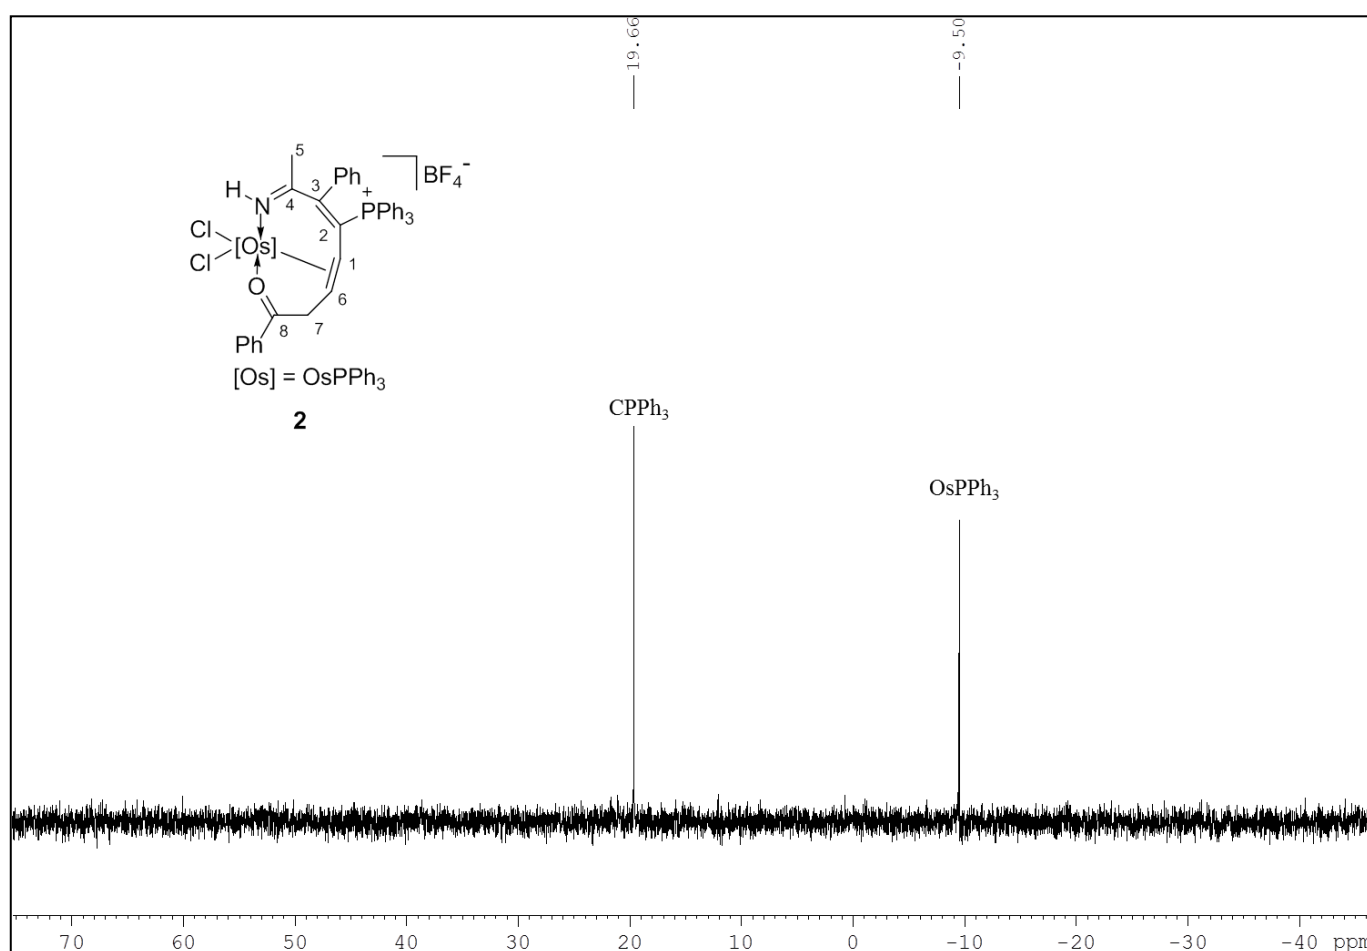

Figure S1-1 The  $^{31}\text{P}\{^1\text{H}\}$  NMR spectrum of complex **2** in  $\text{CD}_2\text{Cl}_2$  at 162.0 MHz.

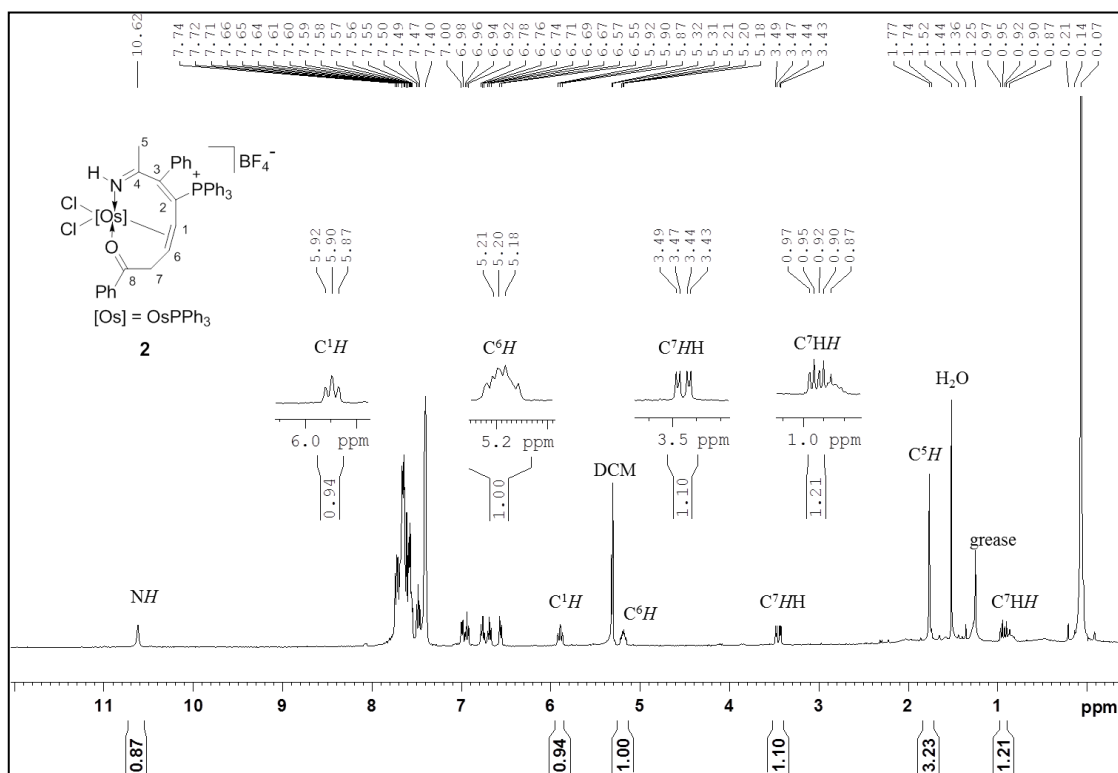

Figure S1-2 The  $^1\text{H}$  NMR spectrum of complex **2** in  $\text{CD}_2\text{Cl}_2$  at 400.1 MHz.

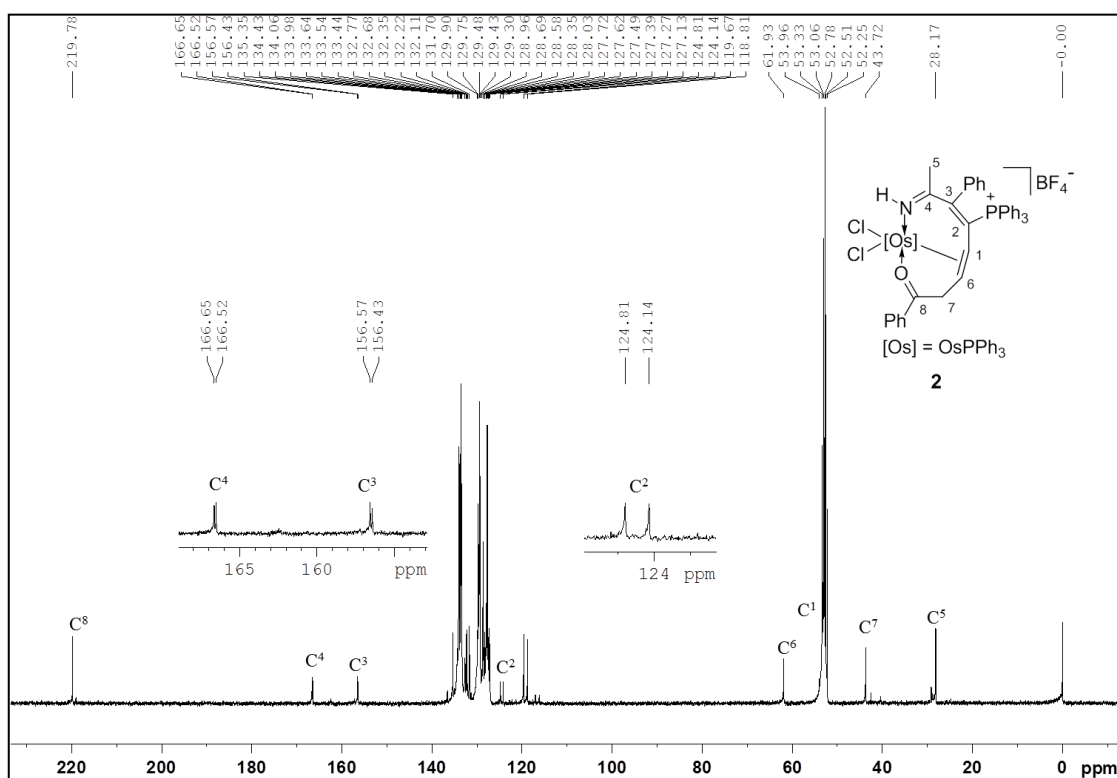

Figure S1-3 The  $^{13}\text{C}\{^1\text{H}\}$  NMR spectrum of complex **2** in  $\text{CD}_2\text{Cl}_2$  at 101.6 MHz.

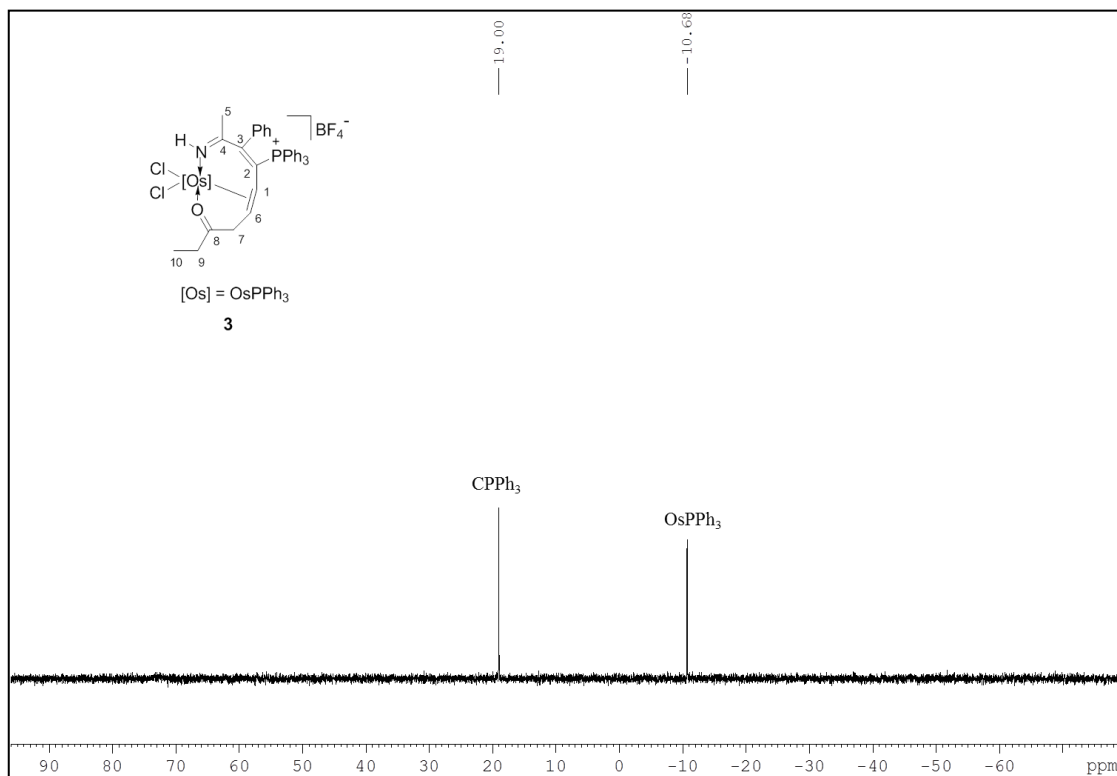

Figure S2-1 The  $^{31}\text{P}\{^1\text{H}\}$  NMR spectrum of complex **3** in  $\text{CDCl}_3$  at 162.0 MHz.

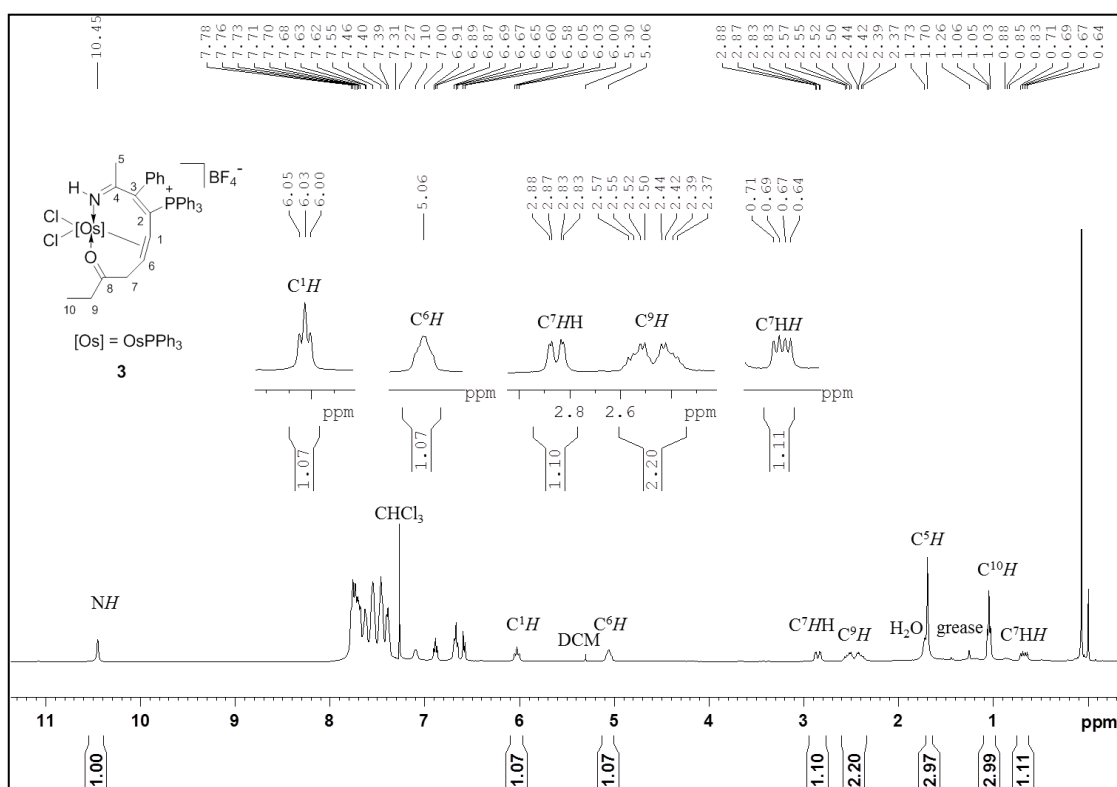

Figure S2-2 The  $^1\text{H}$  NMR spectrum of complex **3** in  $\text{CDCl}_3$  at 400.1 MHz.



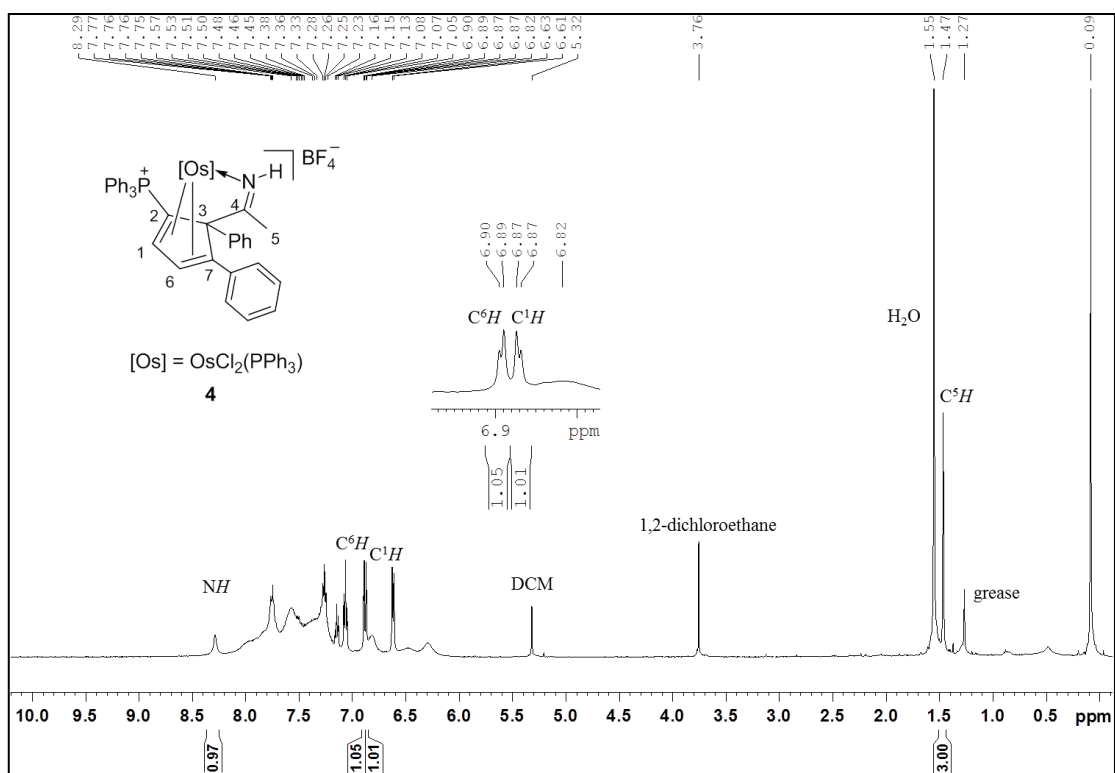

Figure S3-2 The  $^1\text{H}$  NMR spectrum of complex **4** in  $\text{CD}_2\text{Cl}_2$  at 400.1 MHz.

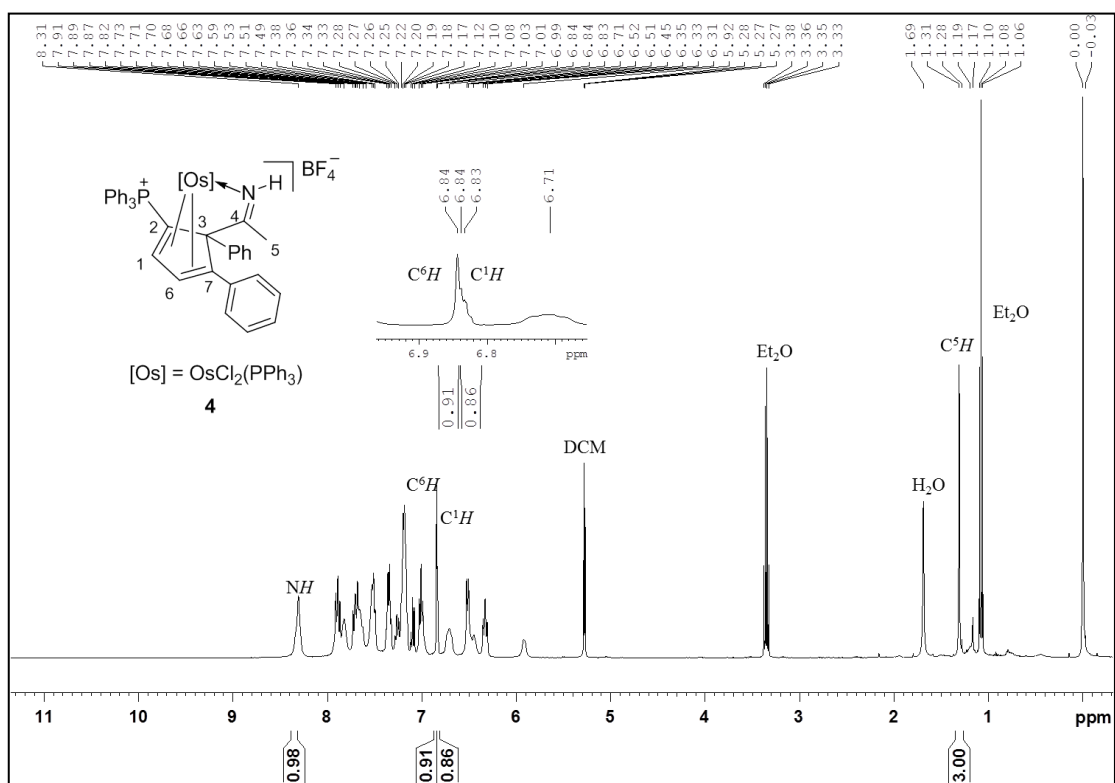

Figure S3-3 The  $^1\text{H}$  NMR spectrum of complex **4** in  $\text{CD}_2\text{Cl}_2$  at 400.1 MHz under 253 K.

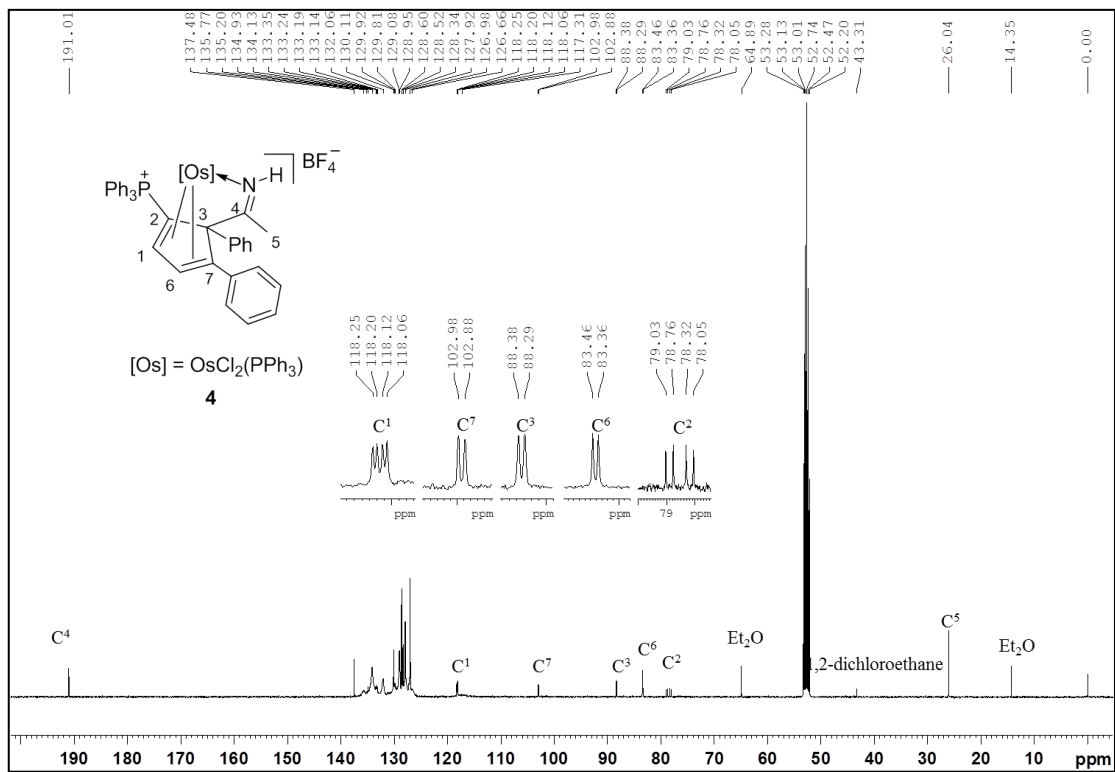

Figure S3-4 The  $^{13}\text{C}\{^1\text{H}\}$  NMR spectrum of complex 4 in  $\text{CD}_2\text{Cl}_2$  at 101.6 MHz.

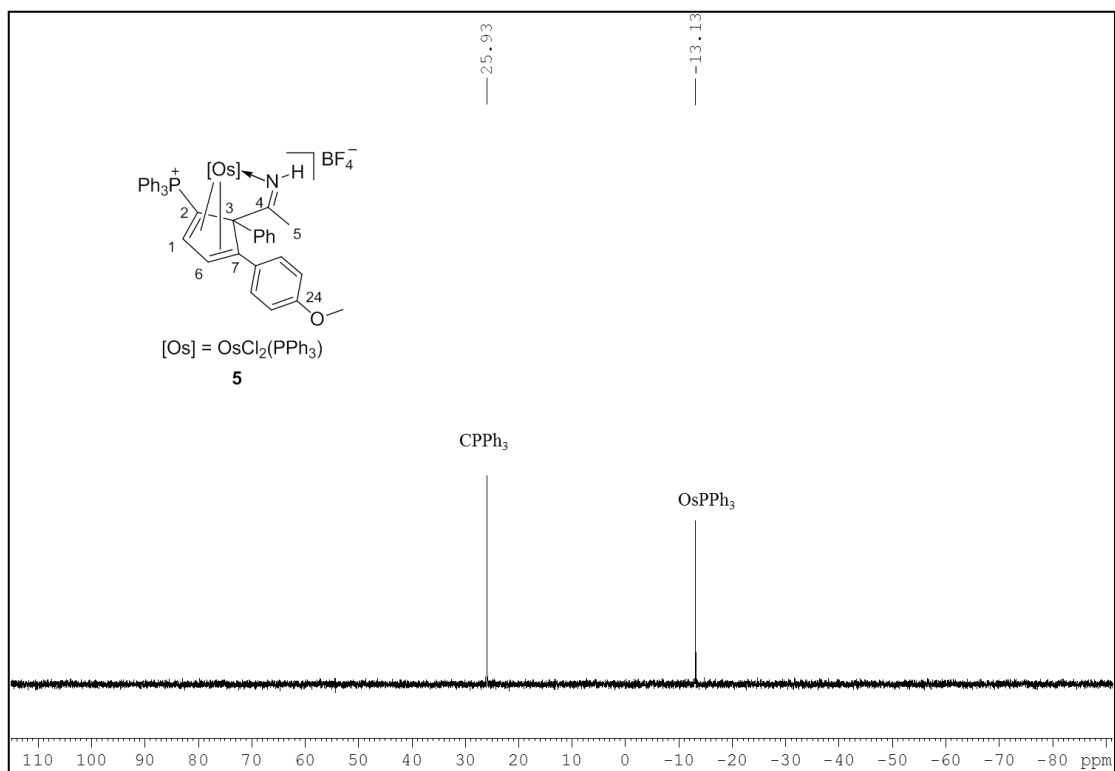

Figure S4-1 The  $^{31}\text{P}\{^1\text{H}\}$  NMR spectrum of complex 5 in  $\text{CD}_2\text{Cl}_2$  at 162.0 MHz.

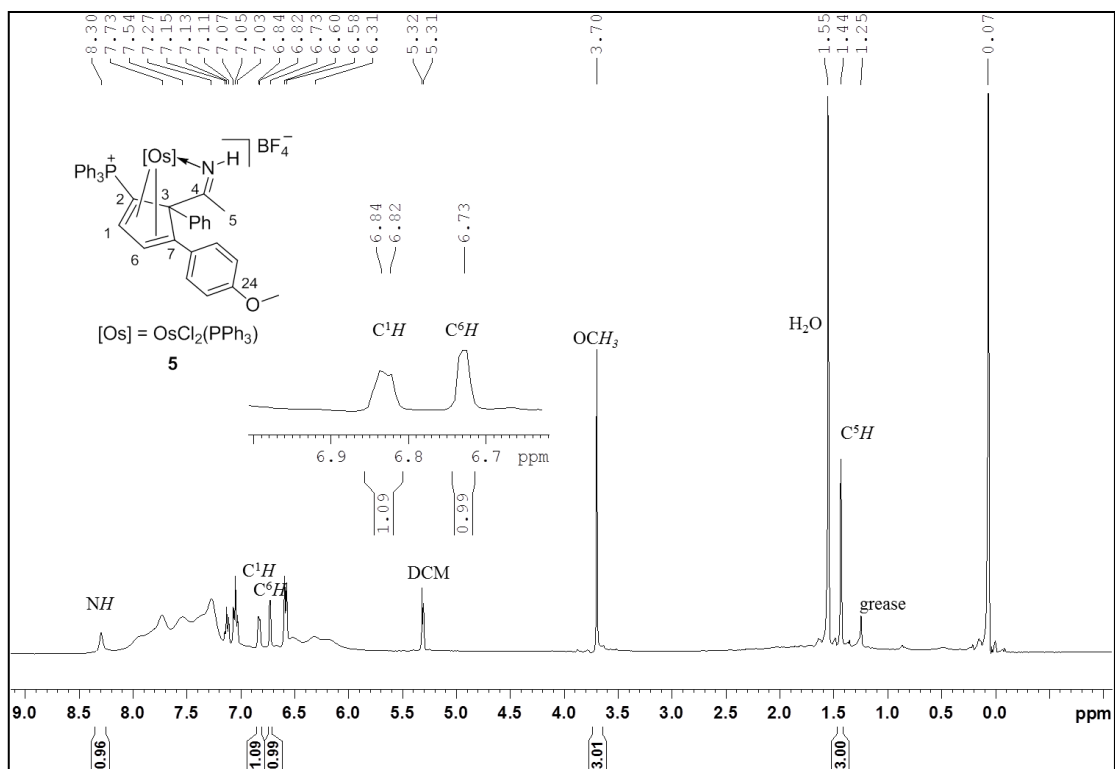

Figure S4-2 The  $^1\text{H}$  NMR spectrum of complex **5** in  $\text{CD}_2\text{Cl}_2$  at 400.1 MHz.

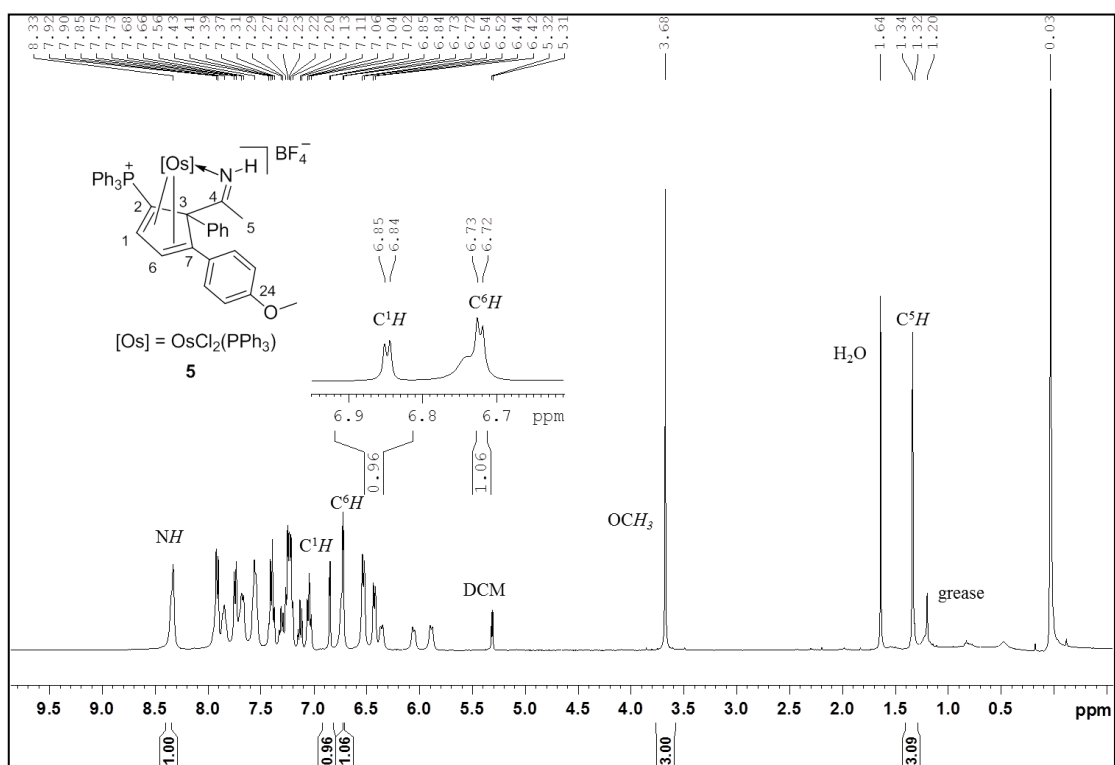

Figure S4-3 The  $^1\text{H}$  NMR spectrum of complex **5** in  $\text{CD}_2\text{Cl}_2$  at 400.1 MHz under 253 K.

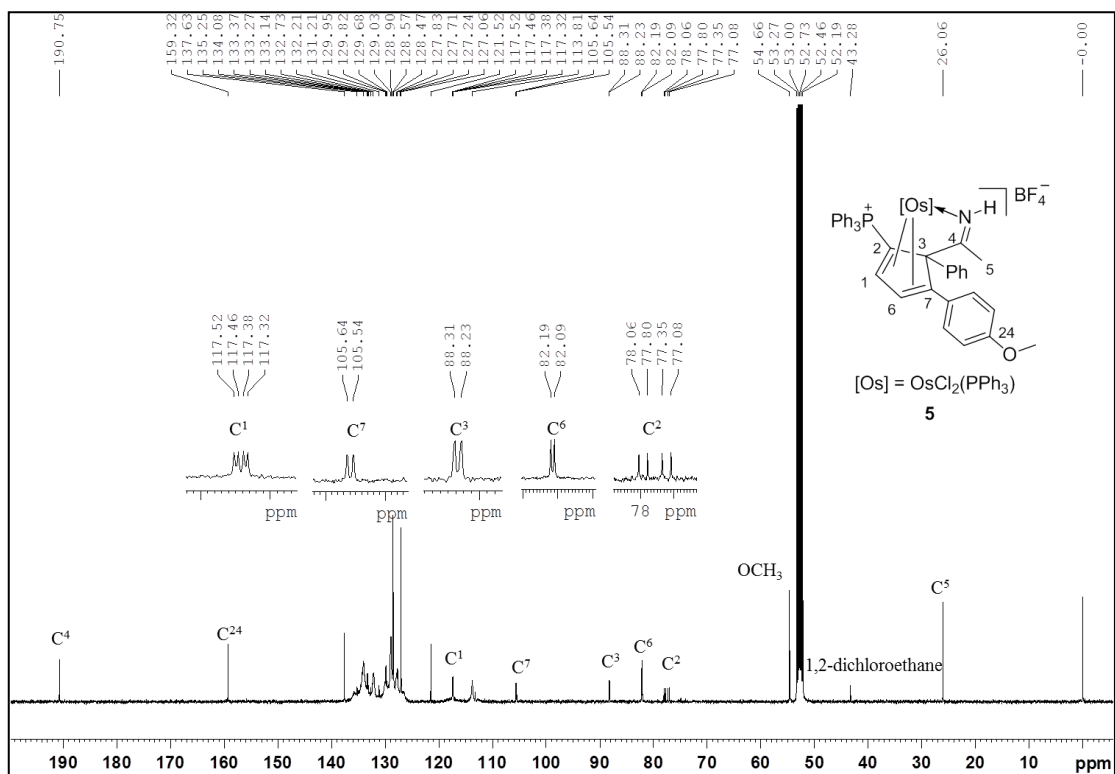

Figure S4-4 The  $^{13}\text{C}\{^1\text{H}\}$  NMR spectrum of complex **5** in  $\text{CD}_2\text{Cl}_2$  at 101.6 MHz.

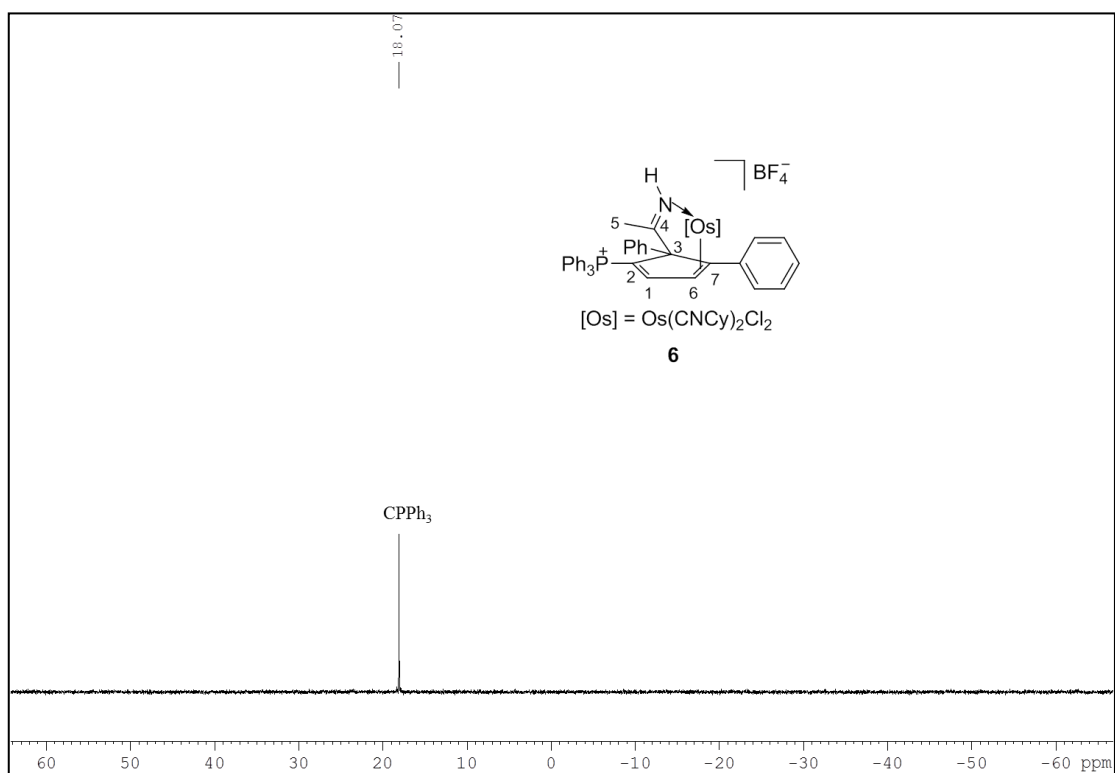

Figure S5-1 The  $^{31}\text{P}\{^1\text{H}\}$  NMR spectrum of complex **6** in  $\text{CD}_2\text{Cl}_2$  at 162.0 MHz.



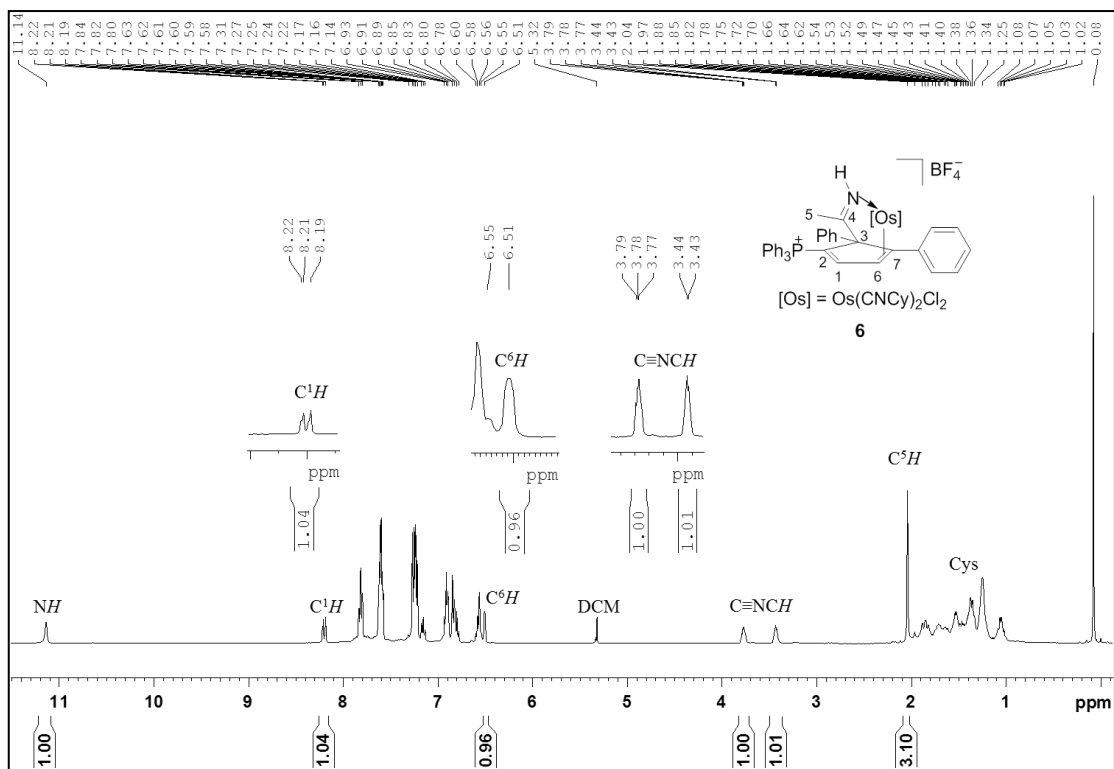

Figure S5-2 The  $^1\text{H}$  NMR spectrum of complex **6** in  $\text{CD}_2\text{Cl}_2$  at 400.1 MHz.

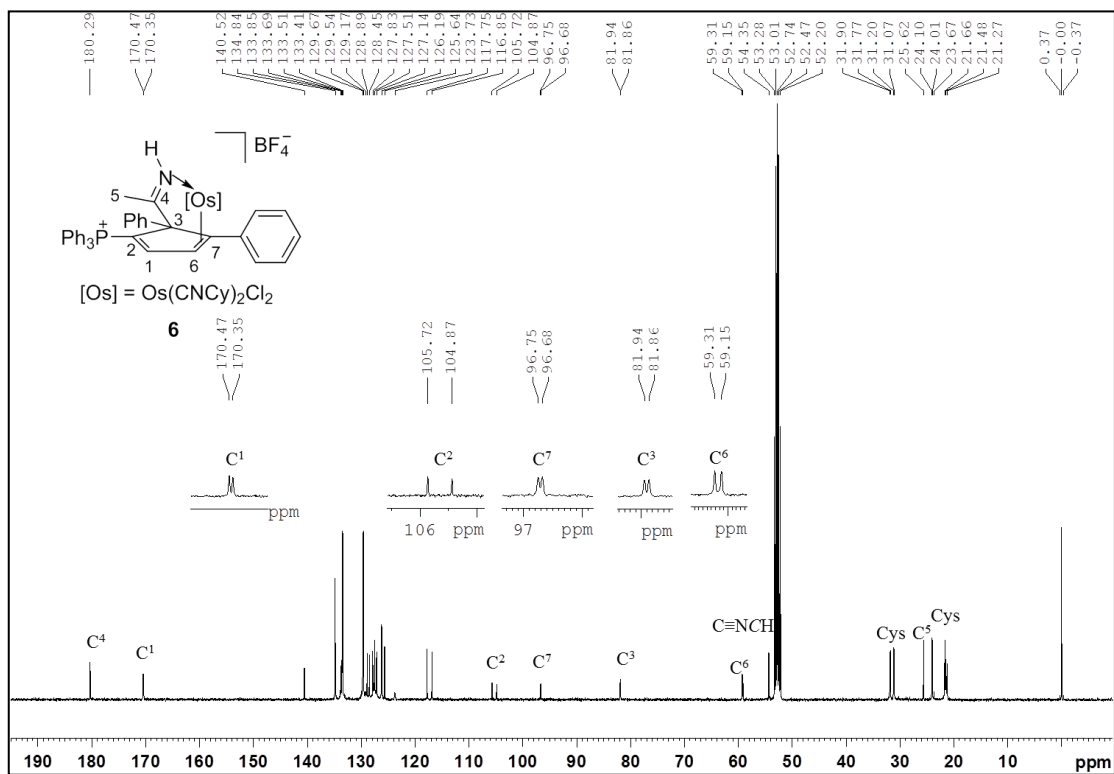

Figure S5-3 The  $^{13}\text{C}\{^1\text{H}\}$  NMR spectrum of complex **6** in  $\text{CD}_2\text{Cl}_2$  at 101.6 MHz.

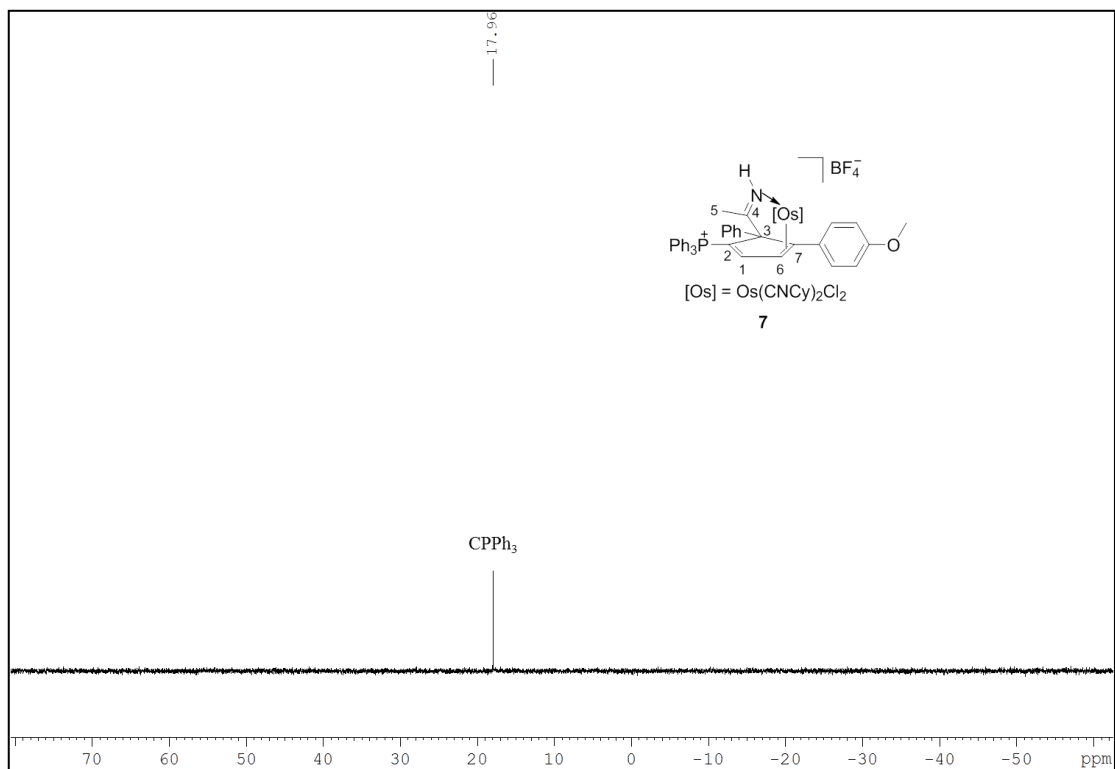

**Figure S6-1** The  $^{31}\text{P}\{^1\text{H}\}$  NMR spectrum of complex **7** in  $\text{CD}_2\text{Cl}_2$  at 162.0 MHz.

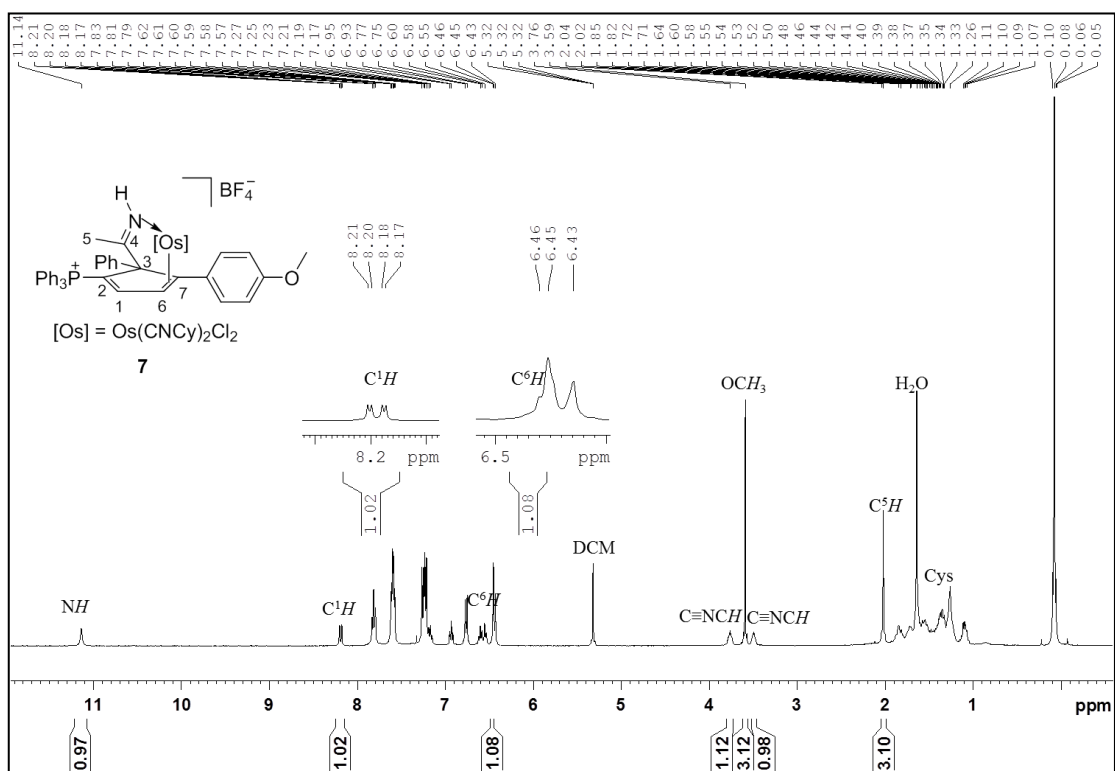

**Figure S6-2** The  $^1\text{H}$  NMR spectrum of complex **7** in  $\text{CD}_2\text{Cl}_2$  at 400.1 MHz.

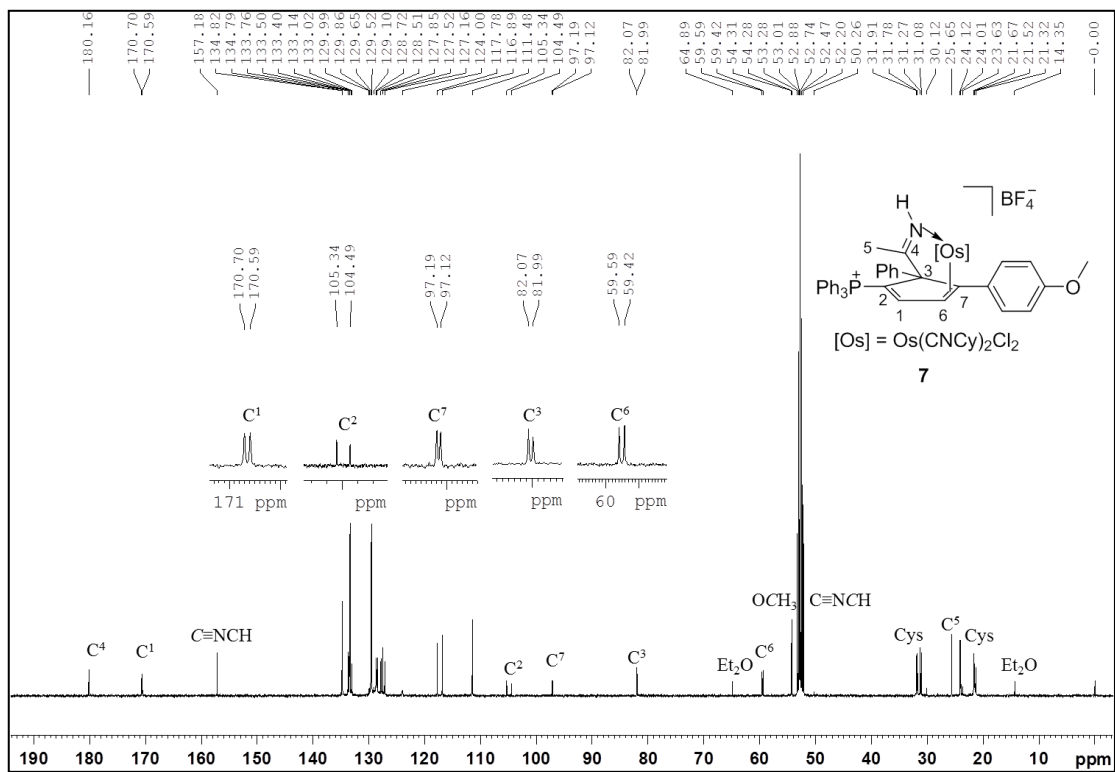

Figure S6-3 The  $^{13}\text{C}\{^1\text{H}\}$  NMR spectrum of complex **7** in  $\text{CD}_2\text{Cl}_2$  at 101.6 MHz.

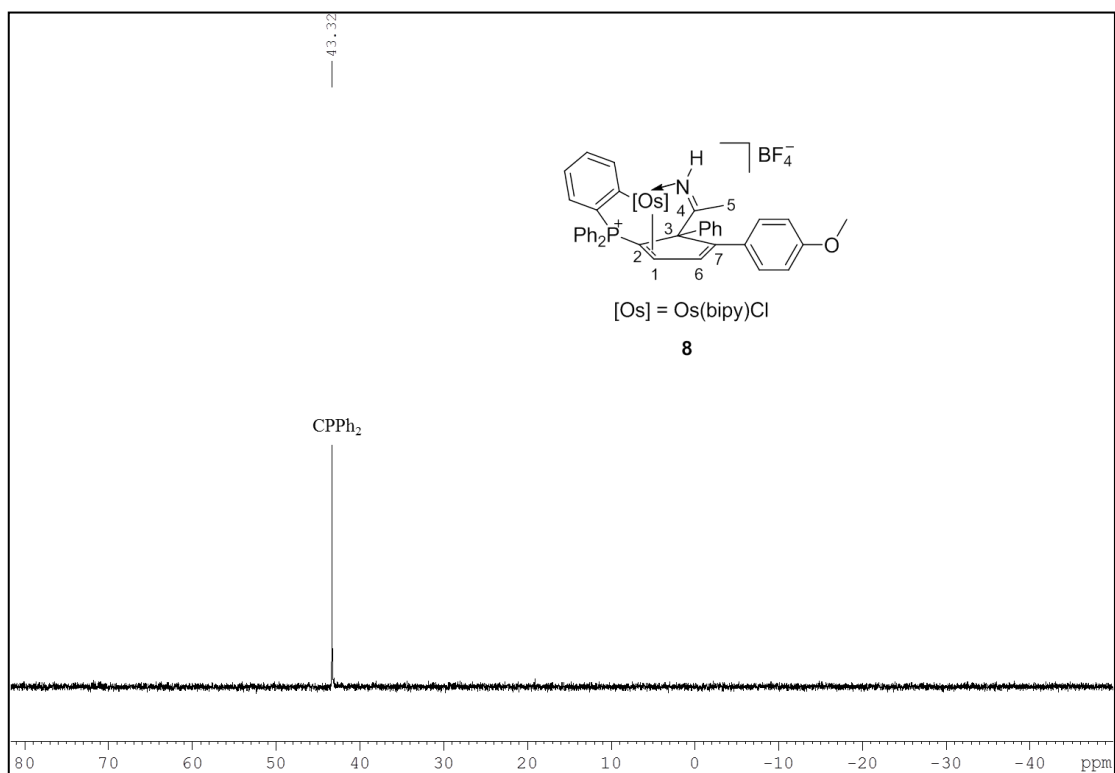

Figure S7-1 The  $^{31}\text{P}\{^1\text{H}\}$  NMR spectrum of complex **8** in  $\text{DMSO}-d_6$  at 162.0 MHz.

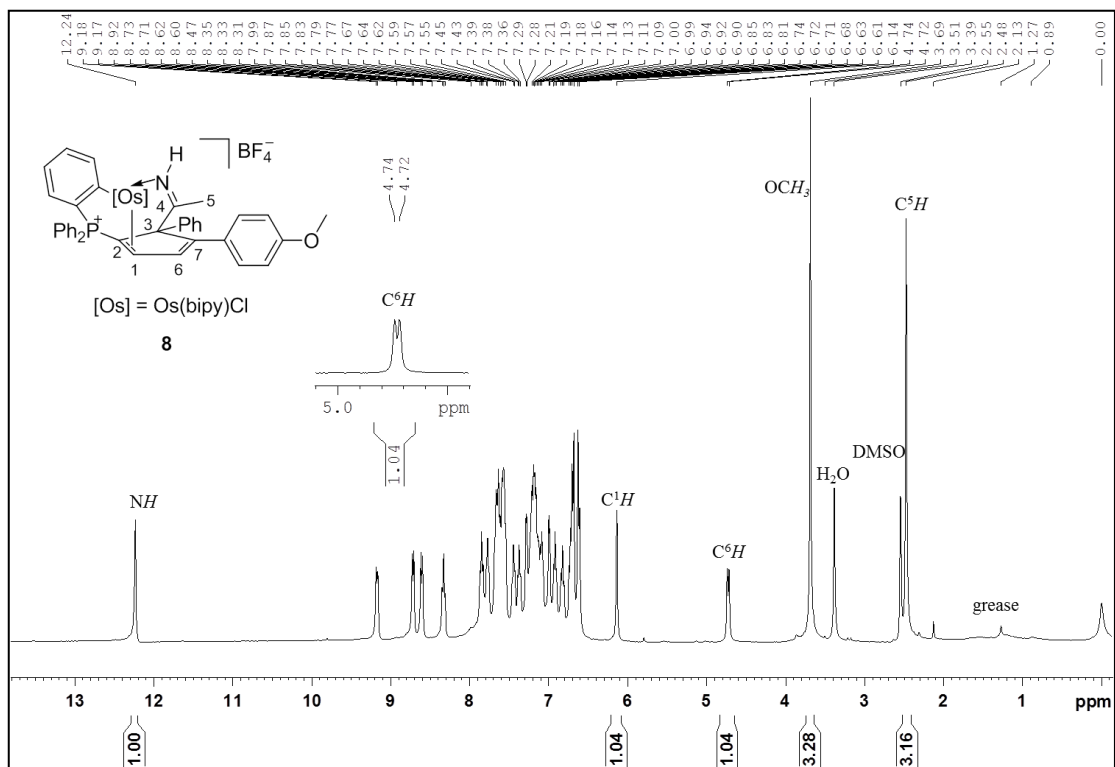

Figure S7-2 The  $^1\text{H}$  NMR spectrum of complex **8** in  $\text{DMSO-D}_6$  at 400.1 MHz.

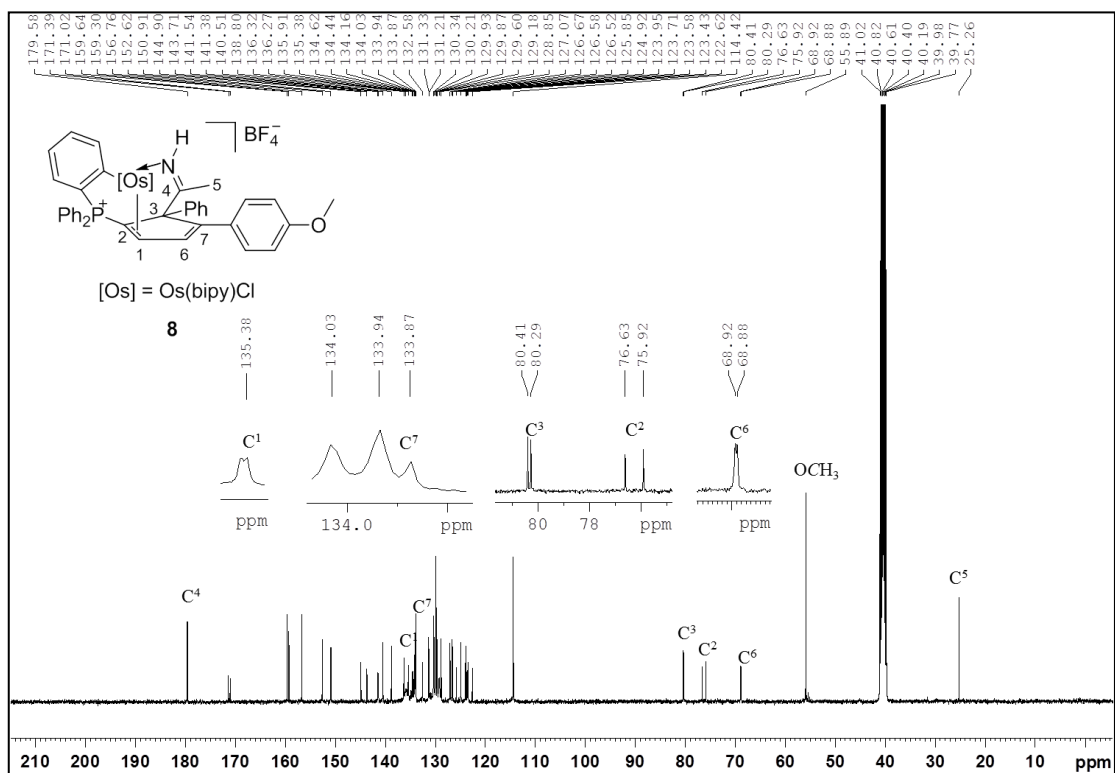

Figure S7-3 The  $^{13}\text{C}\{^1\text{H}\}$  NMR spectrum of complex **8** in  $\text{DMSO-D}_6$  at 101.6 MHz
